# Supplementary material for: Boolean Modeling Reveals the Necessity of Transcriptional Regulation for Bistability in PC12 Cell Differentiation
Source: PubMed Central journal article supplement (PMC4830832; doi:10.3389/fgene.2016.00044), 2016-04-14
Supplement: Image2.pdf [file Image2.pdf]

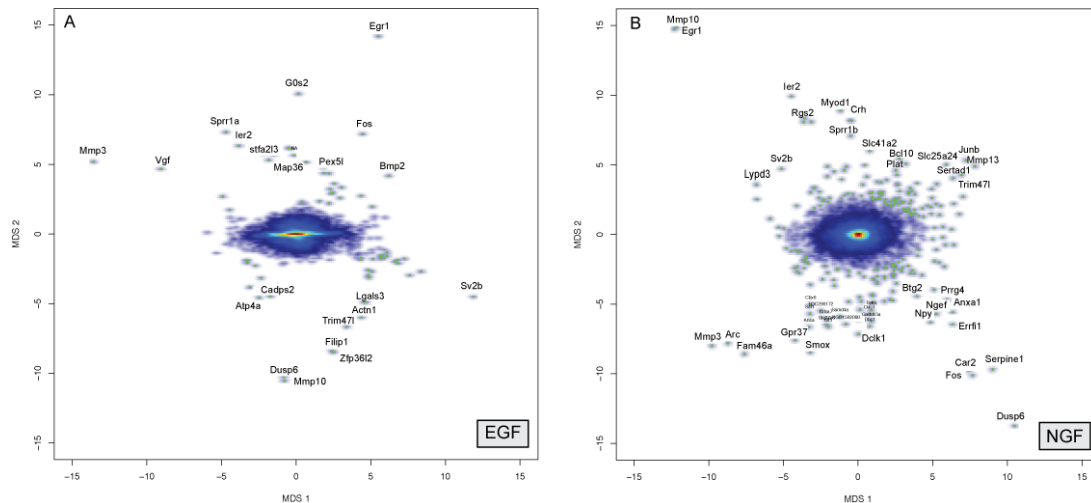

**Supplementary Figure 2. Density plot of the multi-dimensional scaling of the transcriptome time-series after EGF and NGF stimulation.** The matrix  $D$ , containing the pairwise Euclidean distance between all genes, was mapped onto a 2D space. Gene distance in 2D is proportional to their Euclidean distance and therefore the similarity in expression over time. Likewise, genes having a strong and unique response pattern show as outliers in the density plot. (A): transcriptome response of EGF treated cells. (B): transcriptome response of NGF treated cells. The most significantly regulated genes are annotated by their gene symbol.
