# Supplementary material for: Boolean Modeling Reveals the Necessity of Transcriptional Regulation for Bistability in PC12 Cell Differentiation
Source: PubMed Central journal article supplement (PMC4830832; doi:10.3389/fgene.2016.00044), 2016-04-14
Supplement: Table4.pdf [file Table4.pdf]

**Supplementary Table 4. Reactions of prior knowledge network (PKN) and Pubmed IDs of respective publications that report the interactions.**

| No | Reactions             | Pubmed ID                                                        |
|----|-----------------------|------------------------------------------------------------------|
| 1  | NGF→TrkA              | 7571013                                                          |
| 2  | TrkA→SHC              | 7541035                                                          |
| 3  | FAK→SHC               | 9032297,10347094                                                 |
| 4  | SHC→GRB2              | 7513258, 7486657                                                 |
| 5  | GRB2→SOS              | 7739560, 8577724                                                 |
| 6  | SOS→RAS               | 9690470, 8828504, 11777939                                       |
| 7  | TrkA→FRS2             | 10629055, 10092678                                               |
| 8  | FRS2 →C3G             | 10092678, 11278445                                               |
| 9  | C3G→RAP1              | 8524240, 8524240, 12734187, 10753869, 17093062, 9856955, 9853756 |
| 10 | RAS→RAF               | 18316782, 9069260                                                |
| 11 | PKC→RAF               | 7534287, 8321321                                                 |
| 12 | RAF →MEK              | 10082509, 19074159                                               |
| 13 | MEKK1→MEK             | 16006144                                                         |
| 14 | MEK→ERK               | 9069255, 18321244, 20665674                                      |
| 15 | ERK→RSK               | 8674434, 11752651, 11591711, 11865188, 11278279                  |
| 16 | TrkA→PI3K             | 12133829, 1380963                                                |
| 17 | PI3K →AKT             | 9321394, 17826033                                                |
| 18 | TrkA→PLC              | 11283249, 1712104                                                |
| 19 | G(i/o)→PLC            | 18508528                                                         |
| 20 | PLC →DAG              | 11048639, 10579907                                               |
| 21 | PLC →Ca <sup>2+</sup> | 11048639, 2550825                                                |
| 22 | DAG →PKC              | 2550825, 12495431                                                |
| 23 | Ca <sup>2+</sup> →PKC | 3014651                                                          |
| 24 | AP1→uPAR              | 15963460                                                         |
| 25 | uPAR→uPA/PLAT         | 8798468                                                          |
| 26 | uPA/PLAT→Plasmin      | 1381366, 6891264, 1378833, 10190280, 11359936, 15688295          |
| 27 | Plasmin→Mmp3/10       | 9398846                                                          |
| 28 | Mmp3/10 → ECM         | 10469644, 8612226                                                |
| 29 | ECM →Itga1            | 10215583                                                         |
| 30 | Itga1→FAK             | 16919435, 9616126                                                |
| 31 | RAP-1→FAK             | 23209645, 11809811                                               |
| 32 | AP1→Npy               | 11150315                                                         |
| 33 | Npy→NPYY1             | 18641693                                                         |
| 34 | NPYY1→G(i/o)          | 9089810, 12209475, 118641693, 9263910, 12710520                  |
| 35 | RAS →RAC1             | 9808620, 10793146, 16203995                                      |
| 36 | RAC1→MEKK4            | 9079650                                                          |
| 37 | RAC1→MEKK1            | 11057896, 9305638, 14581471, 9712898                             |
| 38 | MEKK4→MKK6            | 17726008, 9305639                                                |
| 39 | MEKK4→Mapk3k          | 17726008, 1154276                                                |
| 40 | MEKK1→MKK7            | 11416147                                                         |
| 41 | MKK7→JNK              | 12624093, 9535930                                                |
| 42 | MKK4→JNK              | 9890951, 11057897                                                |
| 43 | Mapk3k →P38           | 8622669, 11304531                                                |
| 44 | MKK6 →P38             | 11304531                                                         |
| 45 | P38→ATF2              | 7535770, 12110590                                                |
| 46 | ERK→ATF2              | 12110590                                                         |
| 47 | JNK→ATF2              | 10777545, 25456131                                               |
| 48 | RSK→CREB              | 8688081, 11909979                                                |
| 49 | AKT→CREB              | 10579998, 12388598, 10753867, 9829964                            |
| 50 | MSK1/2→CREB           | 11909979                                                         |

| No  | Reactions   | Pubmed ID                    |
|-----|-------------|------------------------------|
| 51  | ERK→MSK1/2  | 9687510                      |
| 52  | P38→MSK1/2  | 9687510                      |
| 53  | RSK→SRF     | 8413226, 16868029            |
| 54  | EGR1→ARC    | 21887136                     |
| 55  | CREB→ARC    | 19116276                     |
| 56  | ERK→JUNB    | 22443687                     |
| 57  | JNK→JUNB    | 22443687, 14617628           |
| 58  | AKT→JUNB    | 21135252                     |
| 59  | ERK→JUND    | 12835716                     |
| 60  | JNK→JUND    | 14676207, 12226747           |
| 61  | FOSL1→AP1   | 11150315                     |
| 62  | JUND→AP1    | 15564374, 11150315           |
| 63  | FOS→AP1     | 9069263, 12226747, 15564374  |
| 64  | JUNB→AP1    | 9069263, 12226747, 15564374  |
| 65  | ERK→KLF4    | 12226747, 20711222, 22307056 |
| 66  | JNK→KLF4    | 20711222                     |
| 66  | AKT→KLF4    | 23762260                     |
| 68  | ERK→KLF2    | 24905170                     |
| 69  | AKT→KLF2    | 20525885, 15834135, 16571724 |
| 70  | JNK→KLF2    | 20032497                     |
| 71  | ERK→KLF5    | 19628677                     |
| 72  | AKT→KLF5    | 18424767                     |
| 73  | P53→KLF5    | 16595680                     |
| 74  | JNK→P53     | 9732264, 9724739             |
| 75  | ERK→P53     | 10781582                     |
| 76  | AKT→P53     | 17126425                     |
| 77  | JNK→KLF6    | 19333010                     |
| 78  | P53→KLF6    | 18174288                     |
| 79  | AKT→KLF10   | 21873430, 19013137           |
| 80  | ERK→KLF10   | 117574220, 19013137          |
| 81  | JNK→KLF10   | 23164821                     |
| 82  | CREB→CITED2 | 11279224, 15051727           |
| 83  | ERK→CITED2  | 23082118, 17283246           |
| 84  | P53→CITED2  | 18495890                     |
| 85  | JNK→BTG2    | 11267995                     |
| 86  | AKT→BTG2    | 14734530                     |
| 87  | JNK→ZFP36   | 12646273                     |
| 88  | ERK→ZFP36   | 22433566                     |
| 89  | JNK→MYC     | 11597764, 10551811, 16483932 |
| 90  | ERK→MYC     | 11597764, 16899113, 16483932 |
| 91  | AKT→MYC     | 22461507                     |
| 92  | ERK→ETS1    | 18039929, 15572696, 25294825 |
| 93  | JNK→ETS1    | 23966295, 11027273           |
| 94  | ETS1→Dusp6  | 18321244, 20097731           |
| 95  | ERK→Egr1    | 12393577, 16858414, 20554967 |
| 96  | AKT→Egr1    | 14769801, 18844239           |
| 97  | JNK→Egr1    | 19681663, 22577133           |
| 98  | ERK→Fos     | 12134156, 16123044, 20493519 |
| 99  | AKT→Fos     | 23408974, 9690619            |
| 100 | JNK→Fos     | 14511403, 10972672, 11410534 |
| 101 | ERK→Stat3   | 9343414, 10521505, 11553624  |
| 102 | JNK→Stat3   | 10521505, 11553624           |
| 103 | ERK→Maff    | 21494257, 19251651           |
| 104 | JNK→Maff    | 19013137                     |
| 105 | ATF2→Maff   | 21278380                     |
| 106 | ERK→Fosl1   | 12197835, 11756554           |
| 107 | AKT→Fosl1   | 16490785, 17872495           |
| 108 | JNK→Fosl1   | 12665585                     |
